# Supplementary material for: Evaluation of root water uptake in the ISBA-A-gs land surface model using agricultural yield statistics over France
Source: Copernicus journal article supplement (doi:10.5194/hess-18-4979-2014), 2014-12-10
Supplement: Supplementary file 1 [file hess-18-4979-2014-supplement.pdf]

Supplement of Hydrol. Earth Syst. Sci., 18, 4979–4999, 2014  
<http://www.hydrol-earth-syst-sci.net/18/4979/2014/>  
doi:10.5194/hess-18-4979-2014-supplement  
© Author(s) 2014. CC Attribution 3.0 License.

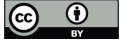

*Supplement of*

## **Evaluation of root water uptake in the ISBA-A-gs land surface model using agricultural yield statistics over France**

**N. Canal et al.**

*Correspondence to:* J.-C. Calvet ([jean-christophe.calvet@meteo.fr](mailto:jean-christophe.calvet@meteo.fr))

## Supplement #1

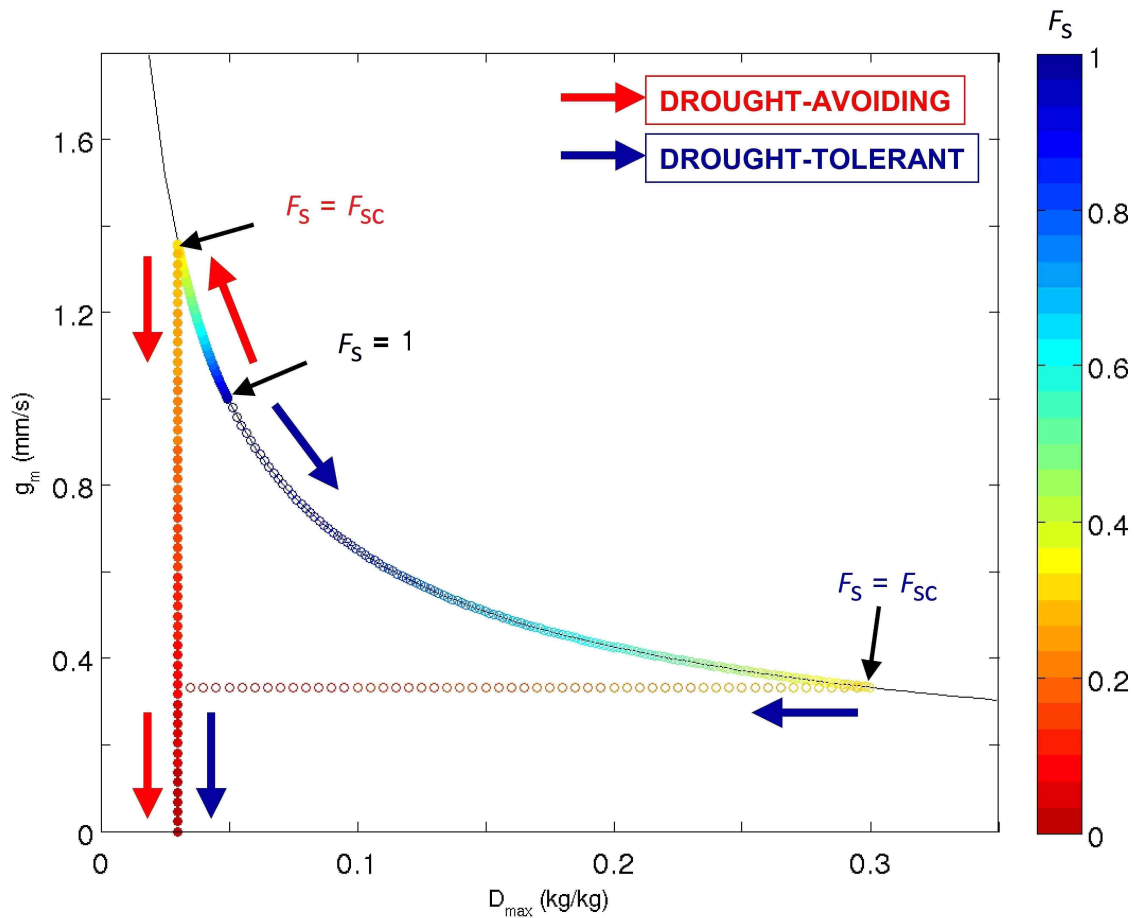

**Figure S1** (adapted from Ca12) – Responses of C3 herbaceous plants to soil moisture stress as represented in the ISBA-A-gs model, through the relationship between the mesophyll conductance at 25°C,  $g_m$ , and the maximum leaf-to-air saturation deficit,  $D_{max}$ , (Calvet, 2000): drought-avoiding and drought-tolerant (red and blue arrows, respectively). The  $g_m$  and  $D_{max}$  values in water-limited conditions are driven by the  $F_S$  stress index. For moderate soil water stress (i.e.  $F_S > F_{SC}$ ), the deviation of  $D_{max}$  from its unstressed value towards its minimum ( $0.03 \text{ kg kg}^{-1}$ ) or maximum ( $0.30 \text{ kg kg}^{-1}$ ) value (drought-avoiding and drought-tolerant, respectively), is proportional to  $F_S$ . The value of  $g_m$  is driven by  $D_{max}$  through a logarithmic equation (solid line):  $\ln(g_m) = 2.381 - 0.6103 \times \ln(D_{max})$ , with  $g_m$  and  $D_{max}$  in units of  $\text{mm s}^{-1}$  and  $\text{g kg}^{-1}$ , respectively. For more pronounced soil water stress (i.e.  $F_S < F_{SC}$ ), either  $g_m$  or  $D_{max}$  (drought-avoiding and drought-tolerant, respectively), decrease from its value at  $F_S = F_{SC}$  to its minimum value, proportional to  $F_S$ . As an example,  $F_{SC}$  and unstressed  $g_m$  values equal to 0.3 and  $1 \text{ mm s}^{-1}$  are used.
